# Supplementary figures and images for: Ferutinin as a Ca2+complexone: lipid bilayers, conductometry, FT-IR, NMR studies and DFT-B3LYP calculations
Source: Royal Society of Chemistry journal article supplement (doi:10.1039/c4dt03892d), 2015-01-01

<sup>13</sup>C, DMSO-d<sub>6</sub>, 9.4T, ferutinin

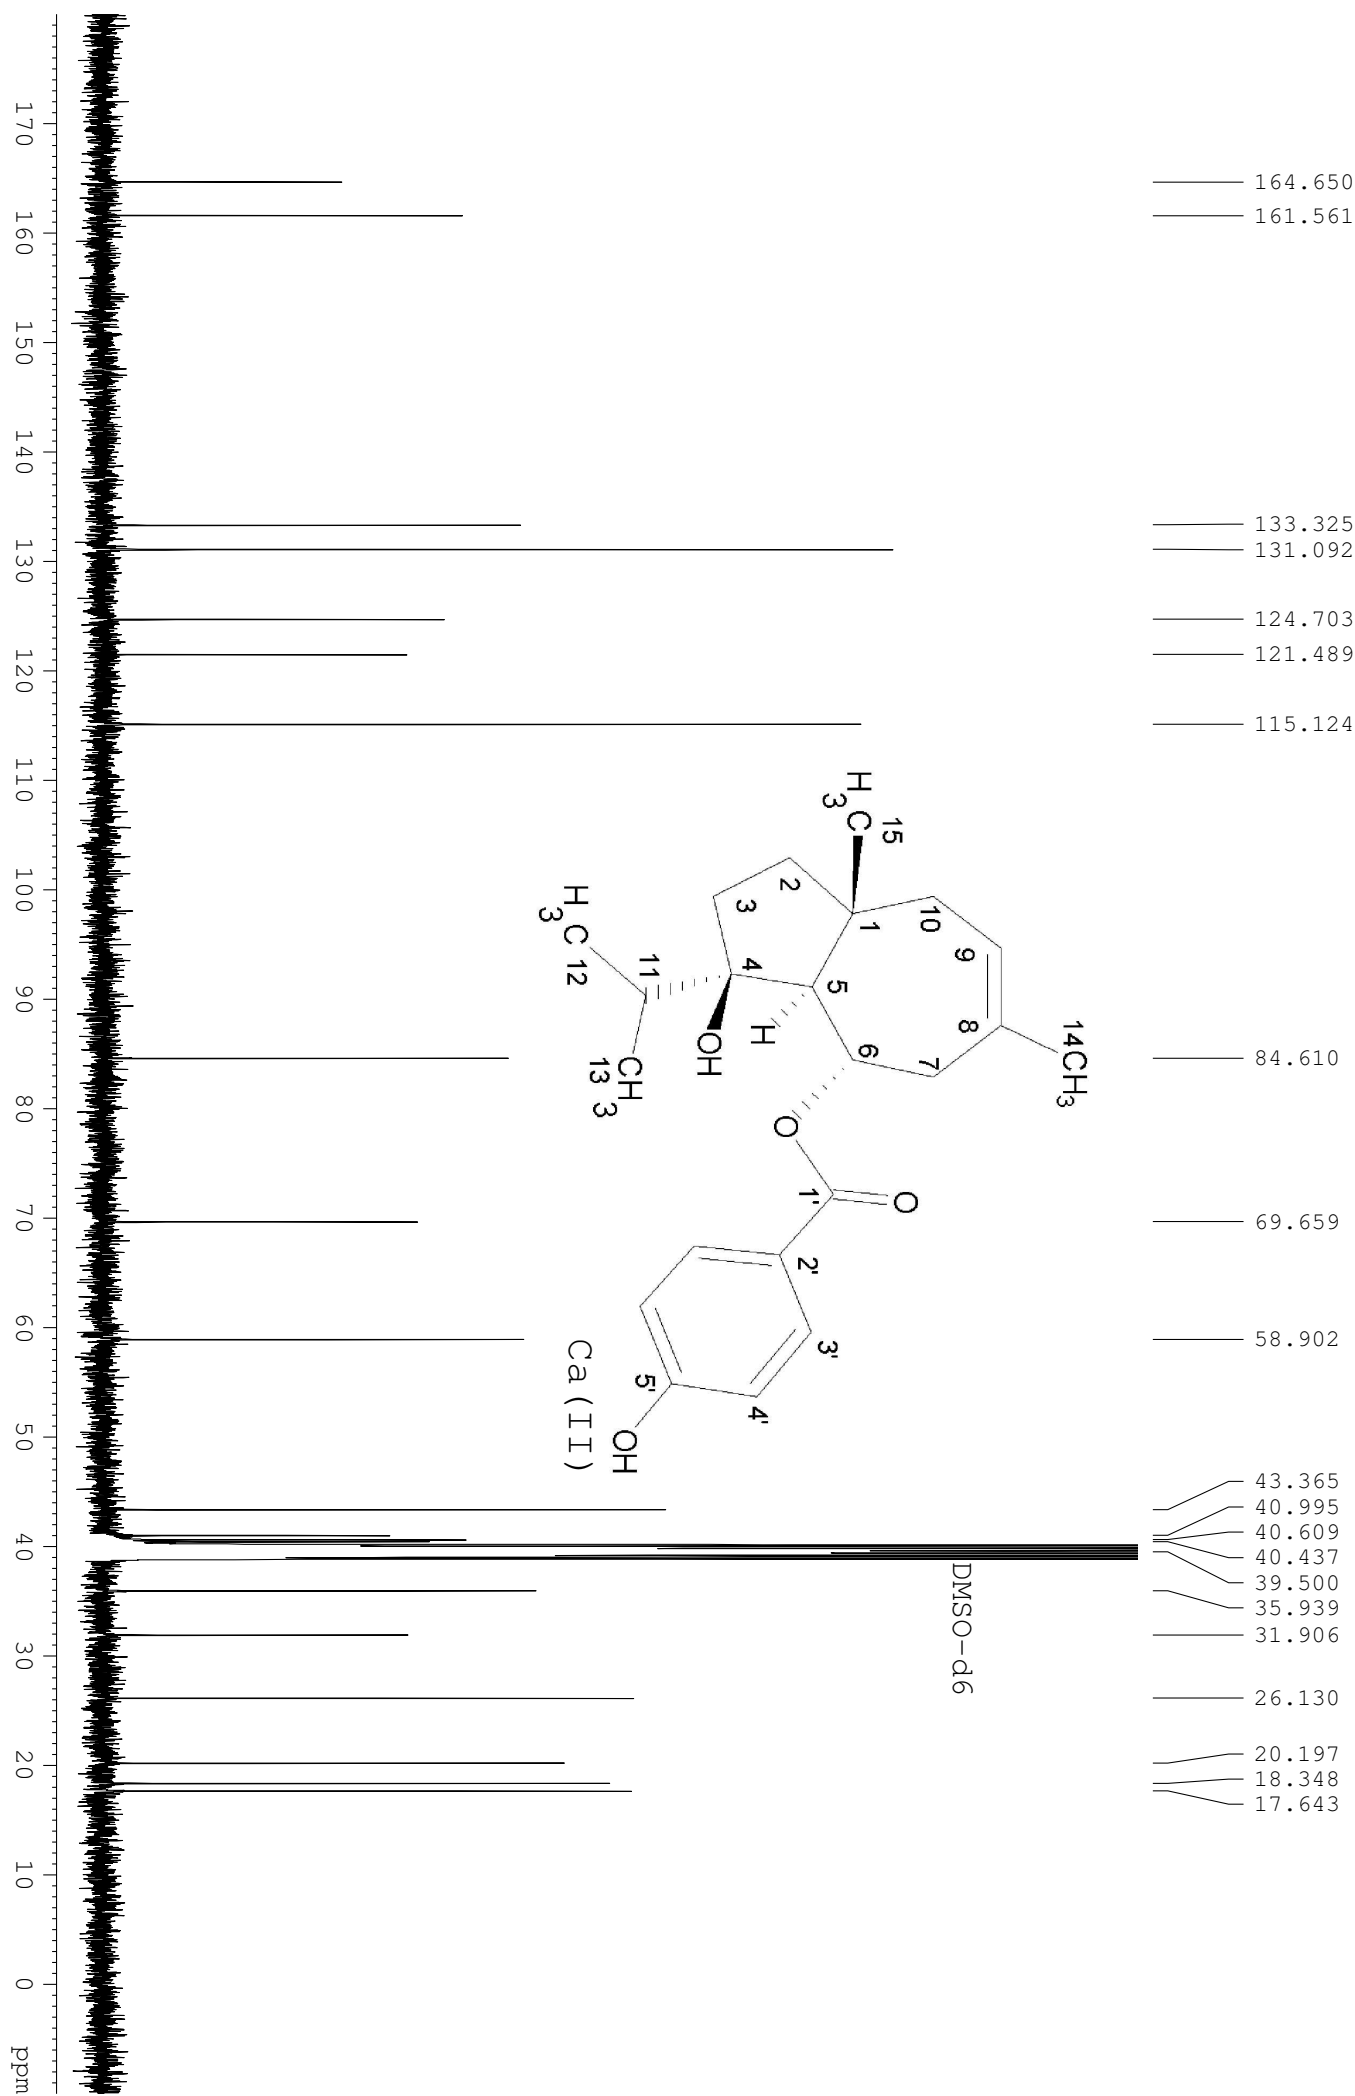

Supplement: c4dt03892d2.pdf [file c4dt03892d2.pdf]

<sup>1</sup>H, DMSO-d<sub>6</sub>, 9.4T, Ferutinin

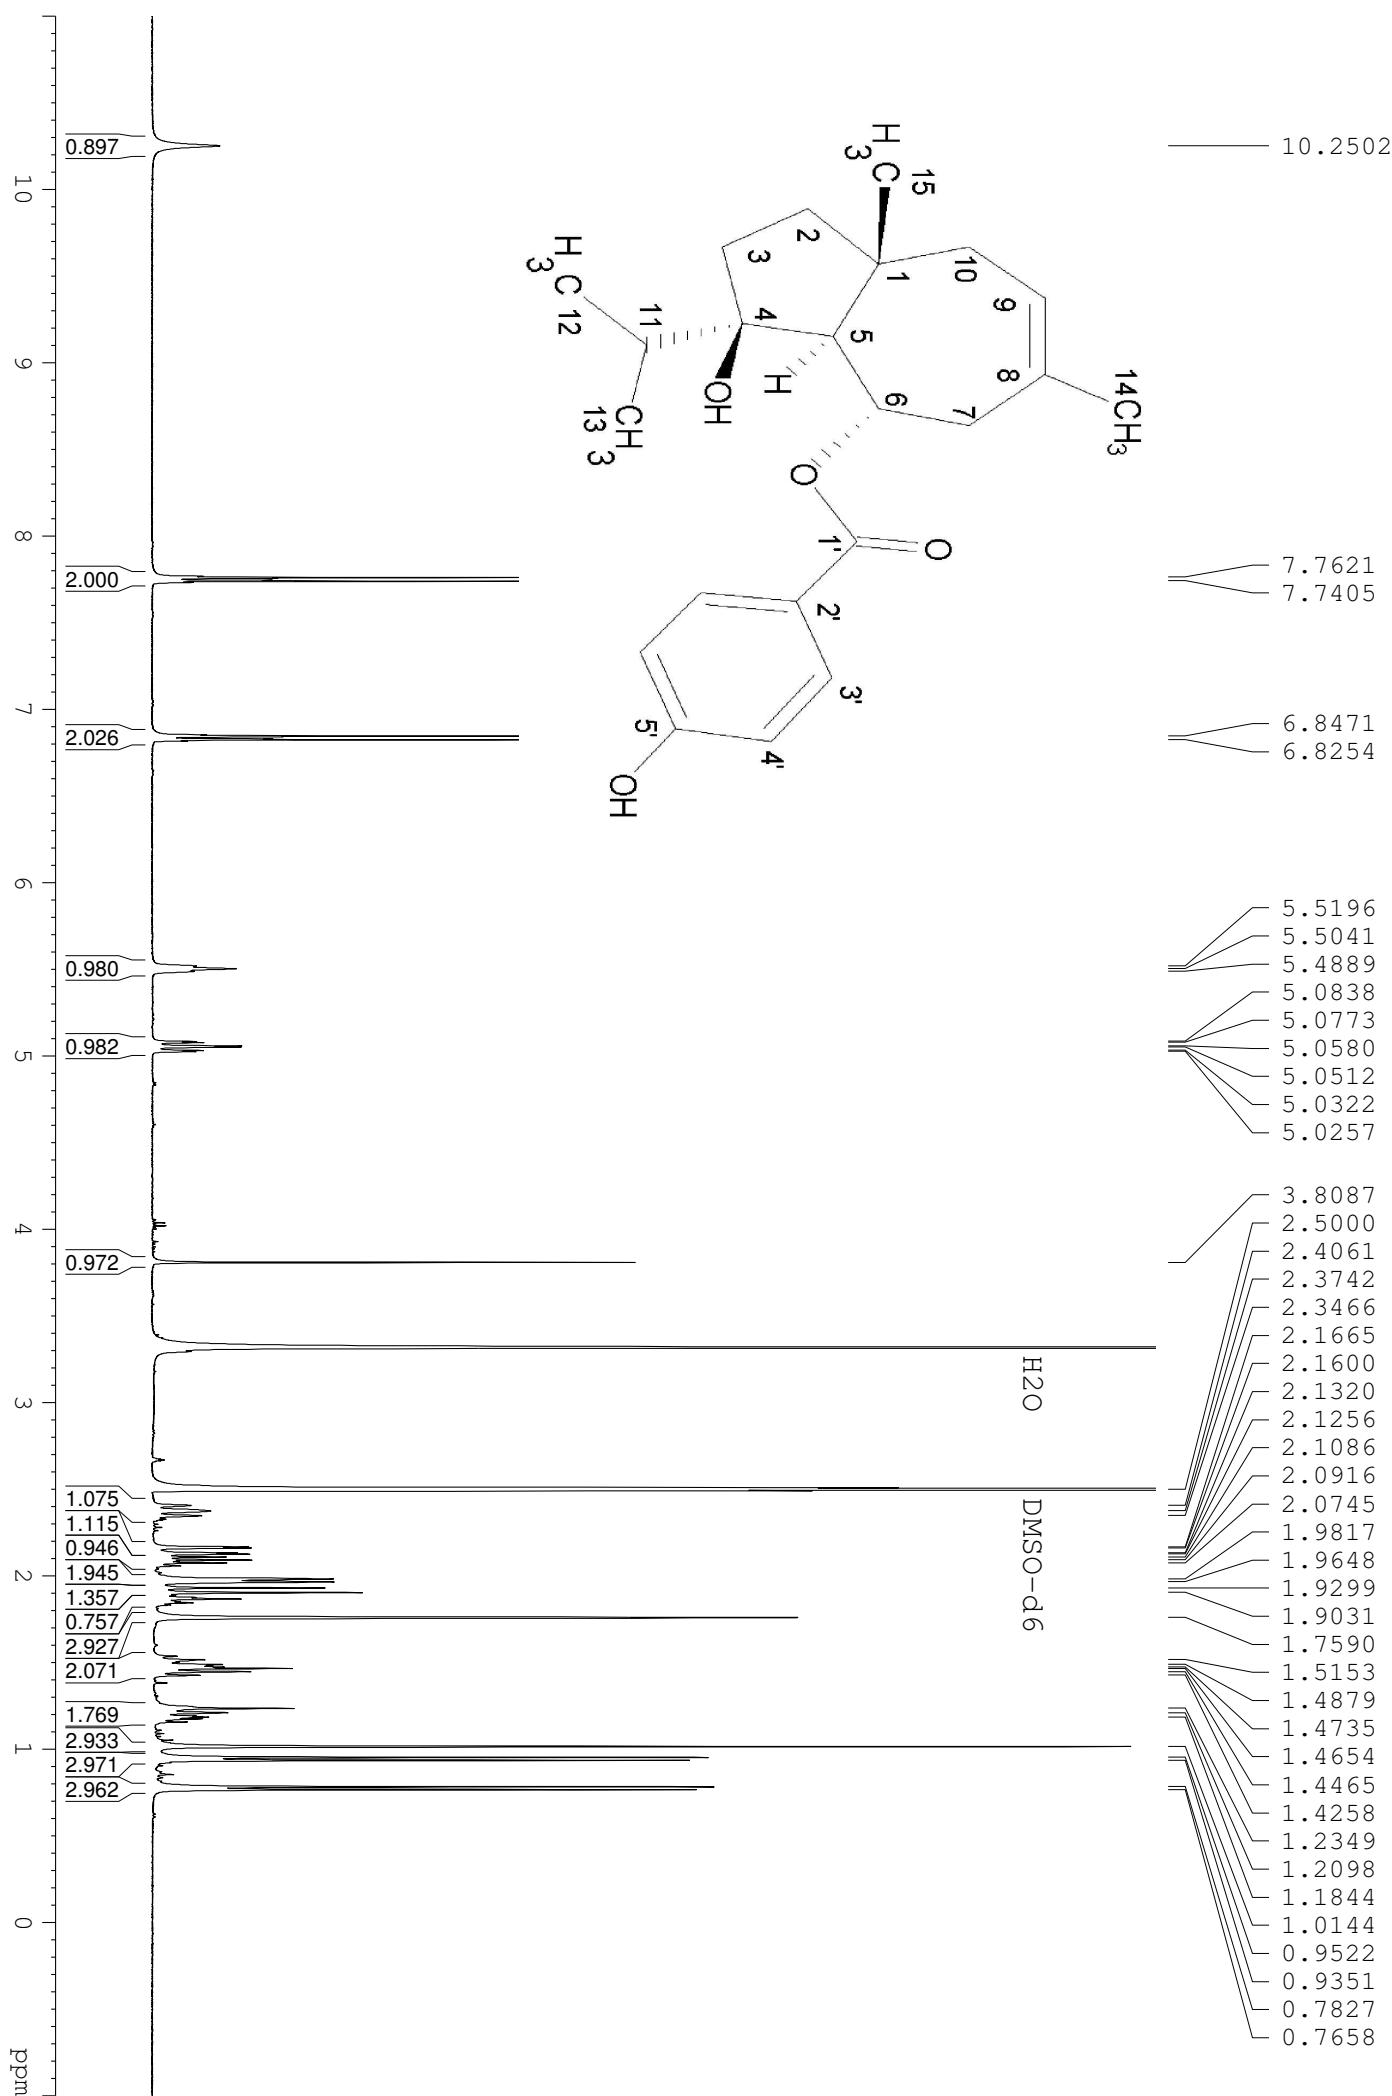

Supplement: c4dt03892d3.pdf [file c4dt03892d3.pdf]

$^{13}\text{C}$ , DMSO-d<sub>6</sub>, 9.4T, Ferutinin-Ca(II) complex

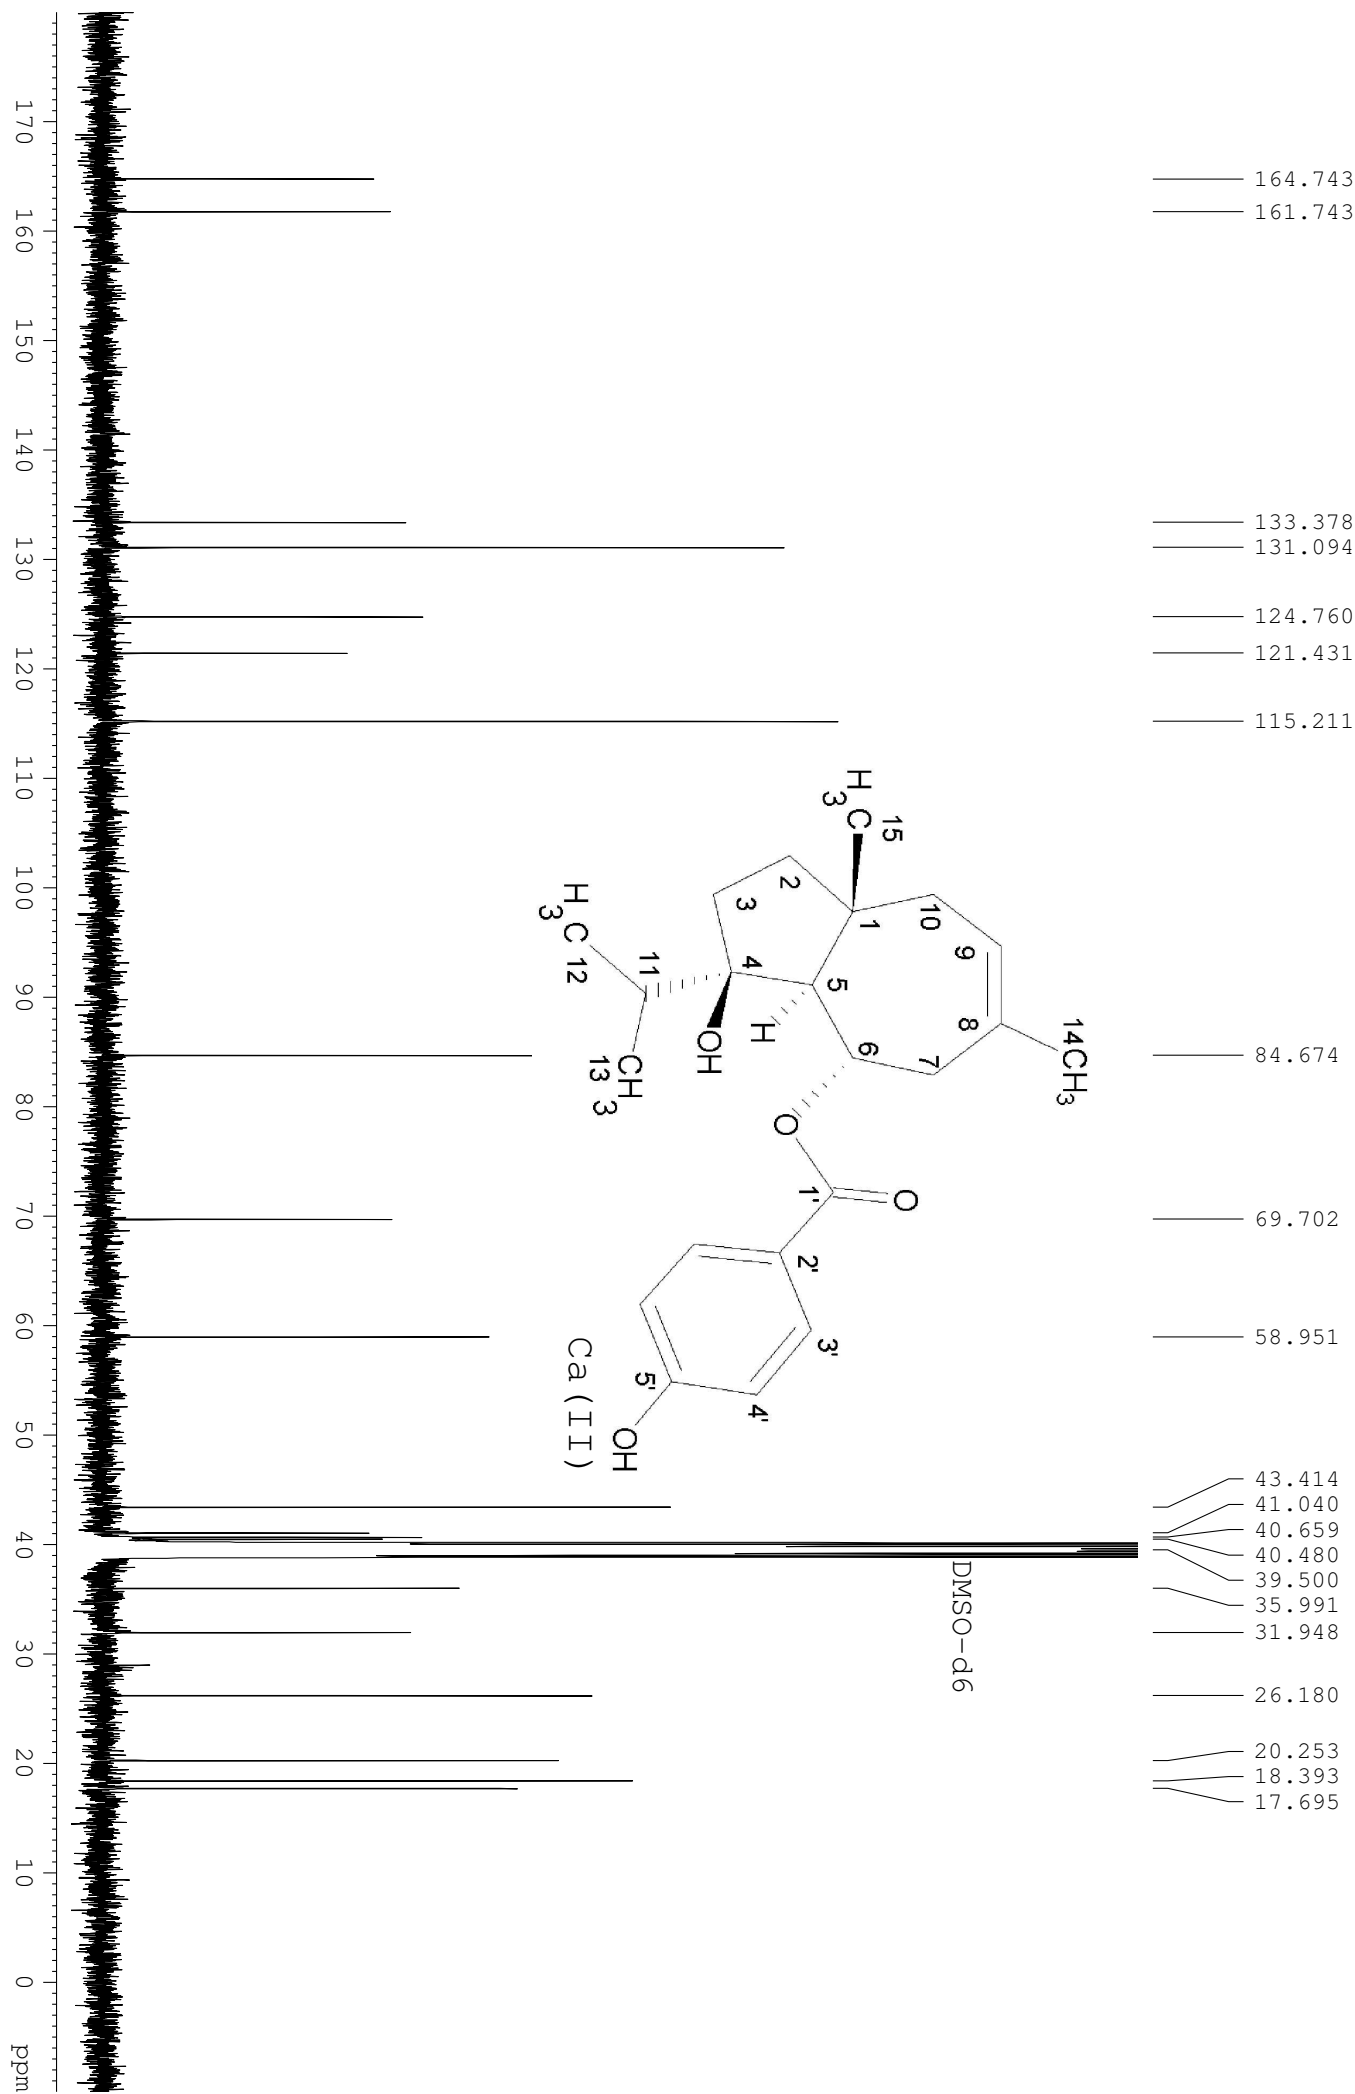

Supplement: c4dt03892d4.pdf [file c4dt03892d4.pdf]

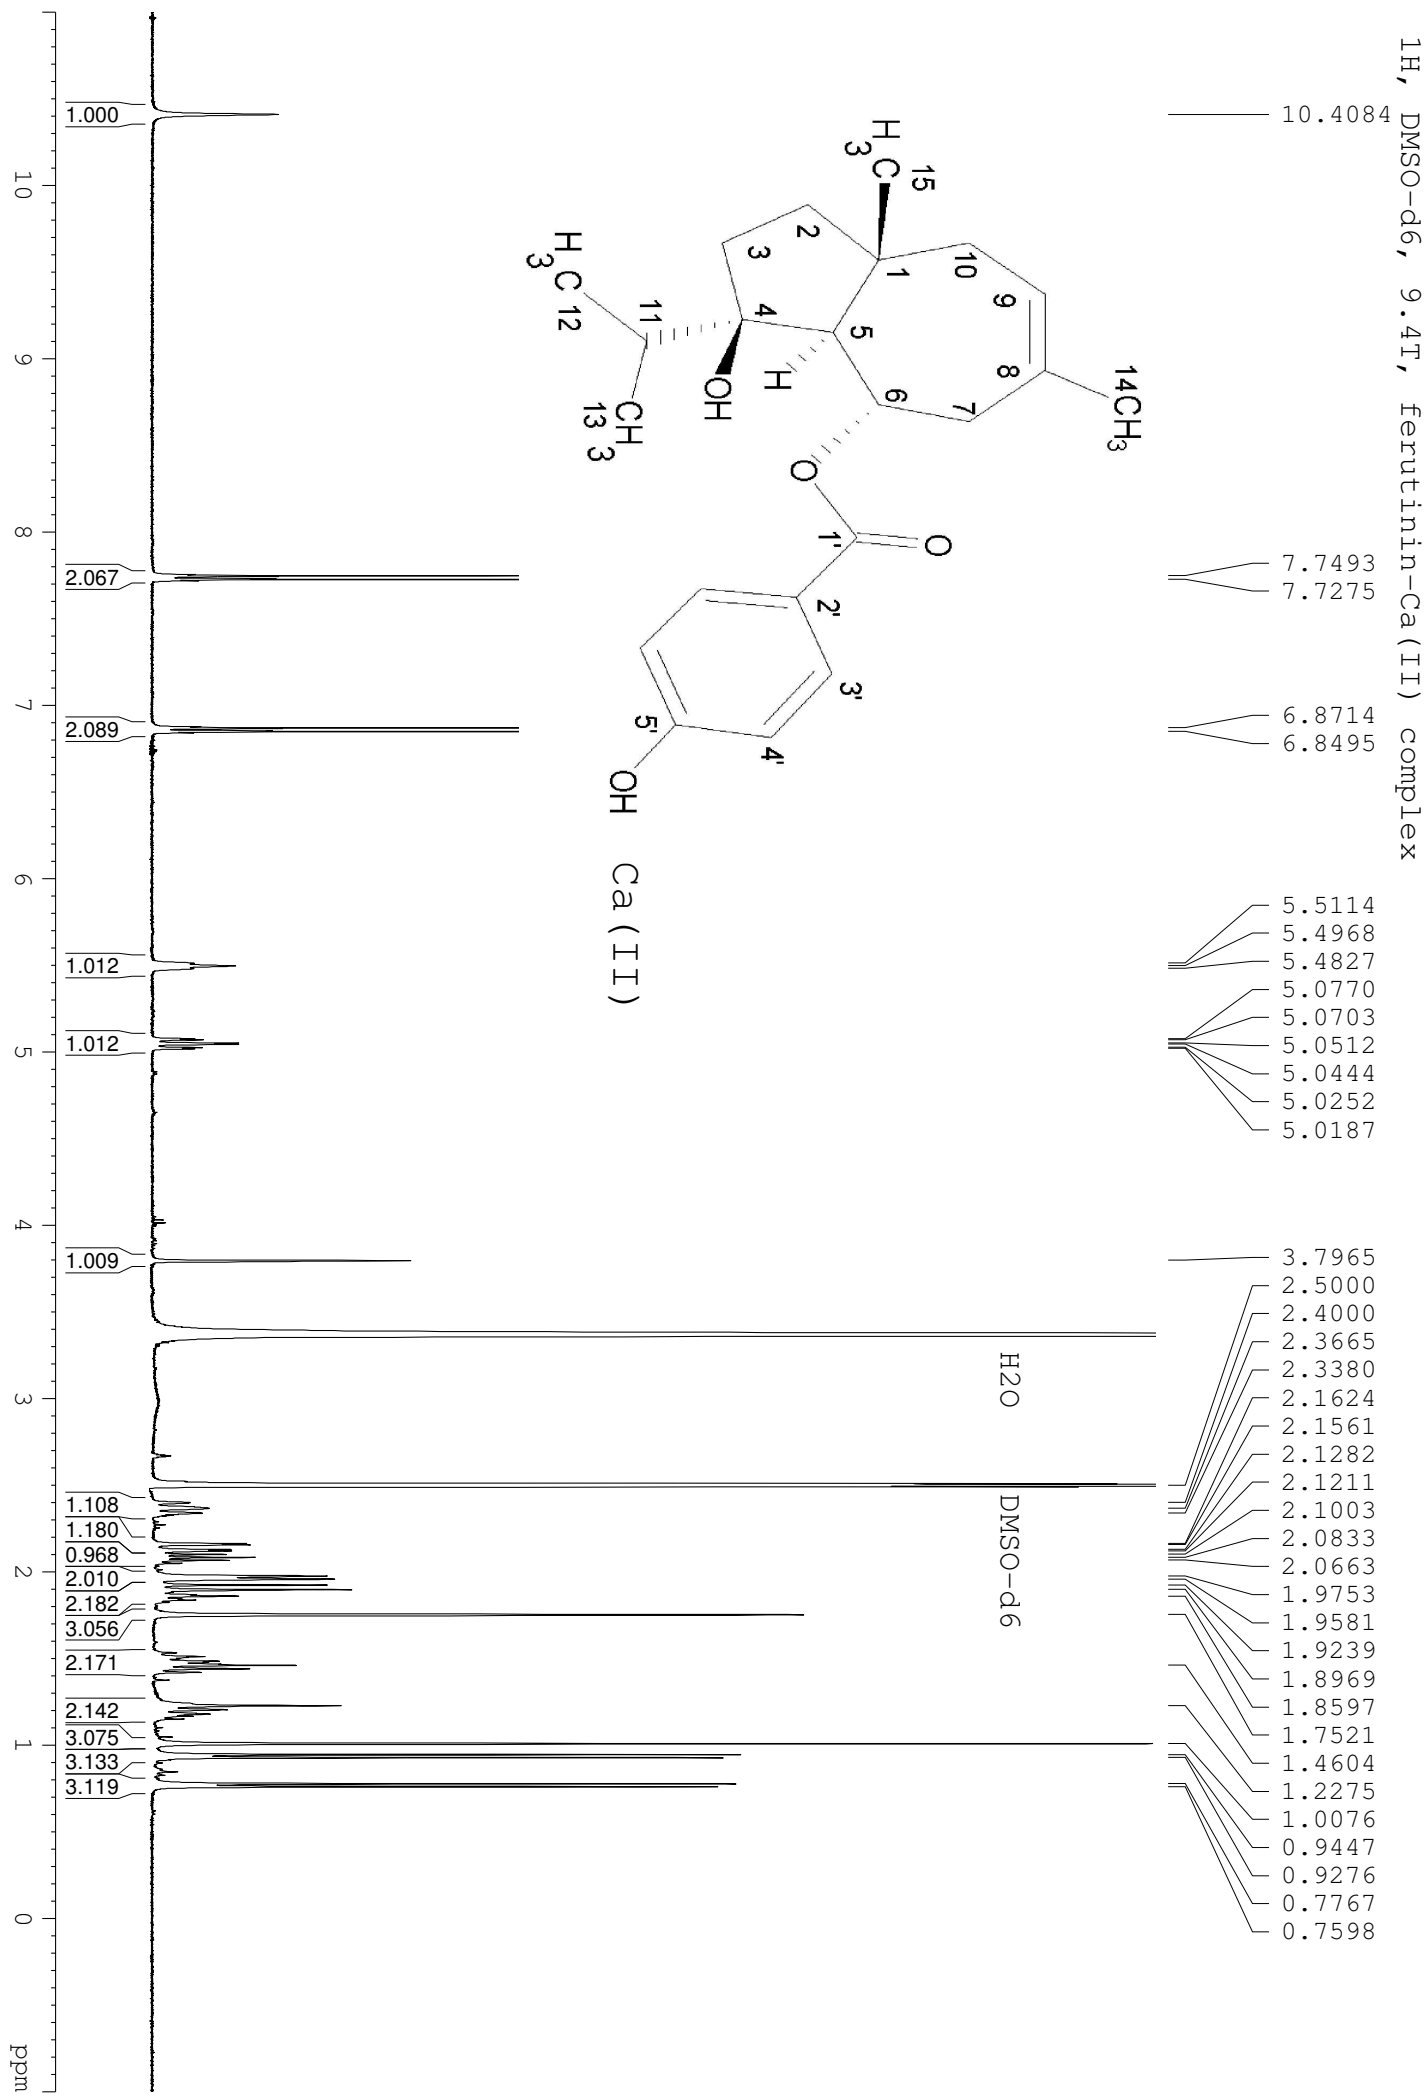

Supplement: c4dt03892d5.pdf [file c4dt03892d5.pdf]
